# Supplementary material
Source: PubMed Central journal article supplement (PMC4771314)
Supplement: AEM.03434-15_zam999116967so1.pdf [file AEM.03434-15_zam999116967so1.pdf]

1 **Supplementary materials**

2  
3 **Endophytic bacterium-triggered reactive oxygen species directly increasing**  
4 **oxygenous sesquiterpenoid content and diversity in *Atractylodes lancea***  
5

6 **RUNNING TITLE** ROS directly impact plant sesquiterpenoid compositions

7  
8 Jia-Yu Zhou,<sup>a</sup> Jie Yuan,<sup>a</sup> Xia Li,<sup>b</sup> Yi-Fan Ning,<sup>a</sup> Chuan-Chao Dai:<sup>a#</sup>

9  
10 Jiangsu Key Laboratory for Microbes and Functional Genomics, Jiangsu Engineering and Technology Research

11 Center for Industrialization of Microbial Resources, College of Life Sciences, Nanjing Normal University,

12 Nanjing, Jiangsu Province, China<sup>a</sup>; Jiangsu High Quality Rice Research and Development Center, Nanjing Branch

13 of China National Center Rice Improvement, Institute of Food Crops, Jiangsu Academy of Agricultural Sciences,

14 Nanjing, Jiangsu Province, China<sup>b</sup>

---

<sup>#</sup> Corresponding author, e-mail: daichuanchao@njnu.edu.cn

**TABLE S1** Oxygenous sesquiterpenoids derived from *in vitro* oxidation by singlet oxygen

| Peak order | Retention time (min) | Compound                                                            | Molecular weight | Chemical formula                  | Chemical structure formula                                                            |
|------------|----------------------|---------------------------------------------------------------------|------------------|-----------------------------------|---------------------------------------------------------------------------------------|
| 1          | 17.764               | Aromadendrene oxide                                                 | 220.35           | C <sub>15</sub> H <sub>24</sub> O | 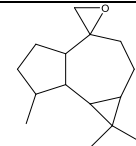   |
| 2          | 18.125               | Hinesol                                                             | 222.37           | C <sub>15</sub> H <sub>26</sub> O |    |
| 3          | 19.234               | Diepicedrene-1-oxide                                                | 220.35           | C <sub>15</sub> H <sub>24</sub> O |    |
| 4          | 19.388               | Tricyclo[5.2.2.0(1,6)]undecan-3-ol,<br>2-methylene-6,8,8-trimethyl- | 220.35           | C <sub>15</sub> H <sub>24</sub> O |    |
| 5          | 19.548               | 7-epi-cis-Sesquisabinene hydrate                                    | 222.37           | C <sub>15</sub> H <sub>26</sub> O |   |
| 6          | 20.852               | Spathulenol                                                         | 220.35           | C <sub>15</sub> H <sub>24</sub> O |  |

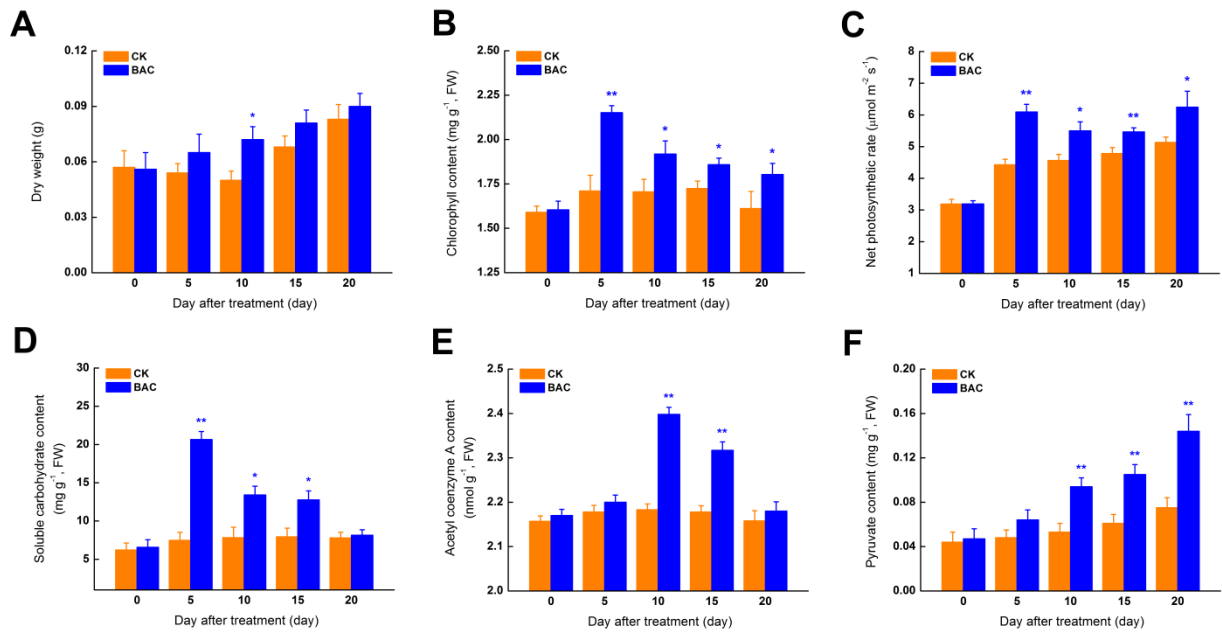

16  
 17 **FIG S1** Impacts of *Pseudomonas fluorescens* ALEB7B colonization on *Atractylodes lancea* primary metabolism  
 18 over time. (A) Plant dry weight. (B) Leaf chlorophyll content. (C) Leaf net photosynthetic rate. (D) Plant soluble  
 19 carbohydrate content. (E) Plant acetyl coenzyme A content. (F) Plant pyruvate content. Results are means for three  
 20 biological replicates. Error bars indicate standard deviations. \* indicates significant differences at  $P < 0.05$  and \*\*  
 21 indicates significant differences at  $P < 0.01$ . CK stands for control. BAC stands for *P. fluorescens* ALEB7B.

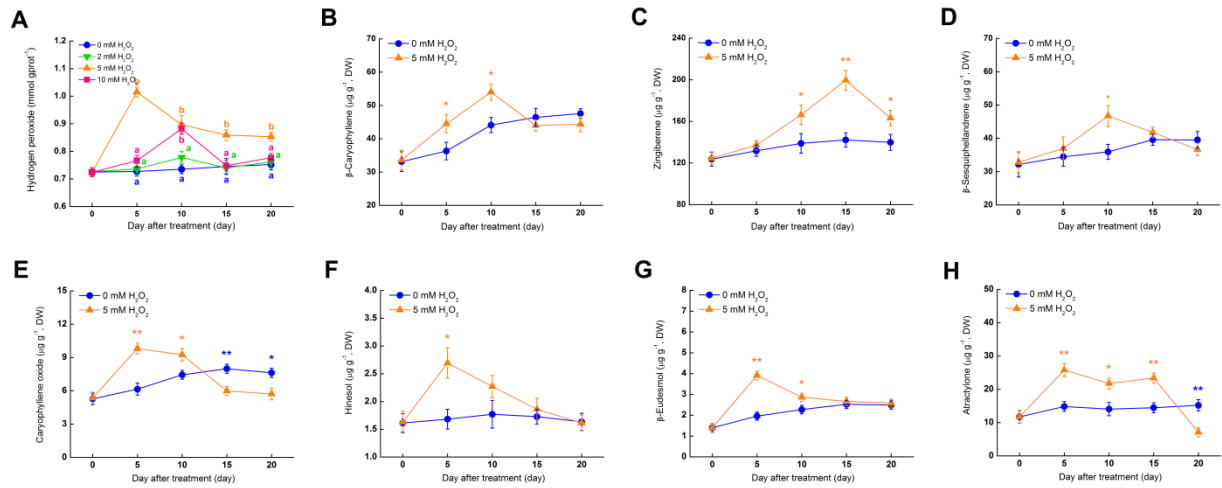

22

23 **FIG S2** Content of endogenous hydrogen peroxide and seven main sesquiterpenoids in *Atractylodes lancea*

24 treated with exogenous hydrogen peroxide over time. (A) Hydrogen peroxide. (B) β-Caryophyllene. (C)

25 Zingiberene. (D) β-Sesquiphellandrene. (E) Caryophyllene oxide. (F) Hinesol. (G) β-Eudesmol. (H) Attractylone.

26 Results are means for three biological replicates. Error bars indicate standard deviations. Different lowercase

27 letters indicate significant differences at  $P < 0.05$ . \* indicates significant differences at  $P < 0.05$  and \*\* indicates

28 significant differences at  $P < 0.01$ . H<sub>2</sub>O<sub>2</sub> stands for hydrogen peroxide.

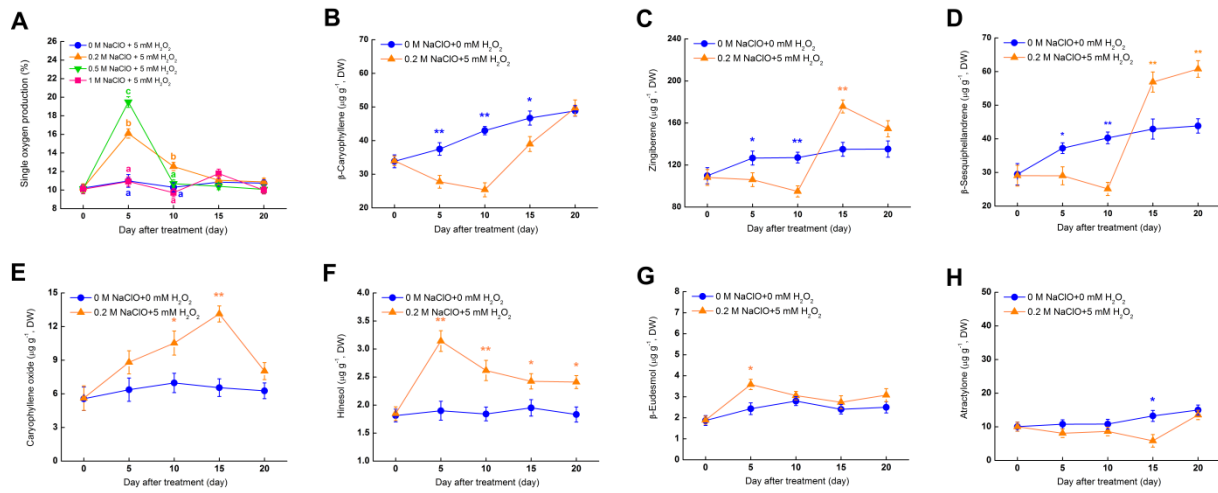

29

30 **FIG S3** Content of endogenous single oxygen and seven main sesquiterpenoids in *Atractylodes lancea* treated  
 31 with exogenous sodium hypochlorite and hydrogen peroxide over time. (A) Single oxygen. (B)  $\beta$ -Caryophyllene.  
 32 (C) Zingiberene. (D)  $\beta$ -Sesquiphellandrene. (E) Caryophyllene oxide. (F) Hinesol. (G)  $\beta$ -Eudesmol. (H)  
 33 Atractylone. Results are means for three biological replicates. Error bars indicate standard deviations. Different  
 34 lowercase letters indicate significant differences at  $P < 0.05$ . \* indicates significant differences at  $P < 0.05$  and \*\*  
 35 indicates significant differences at  $P < 0.01$ . NaClO stands for sodium hypochlorite. H<sub>2</sub>O<sub>2</sub> stands for hydrogen  
 36 peroxide.

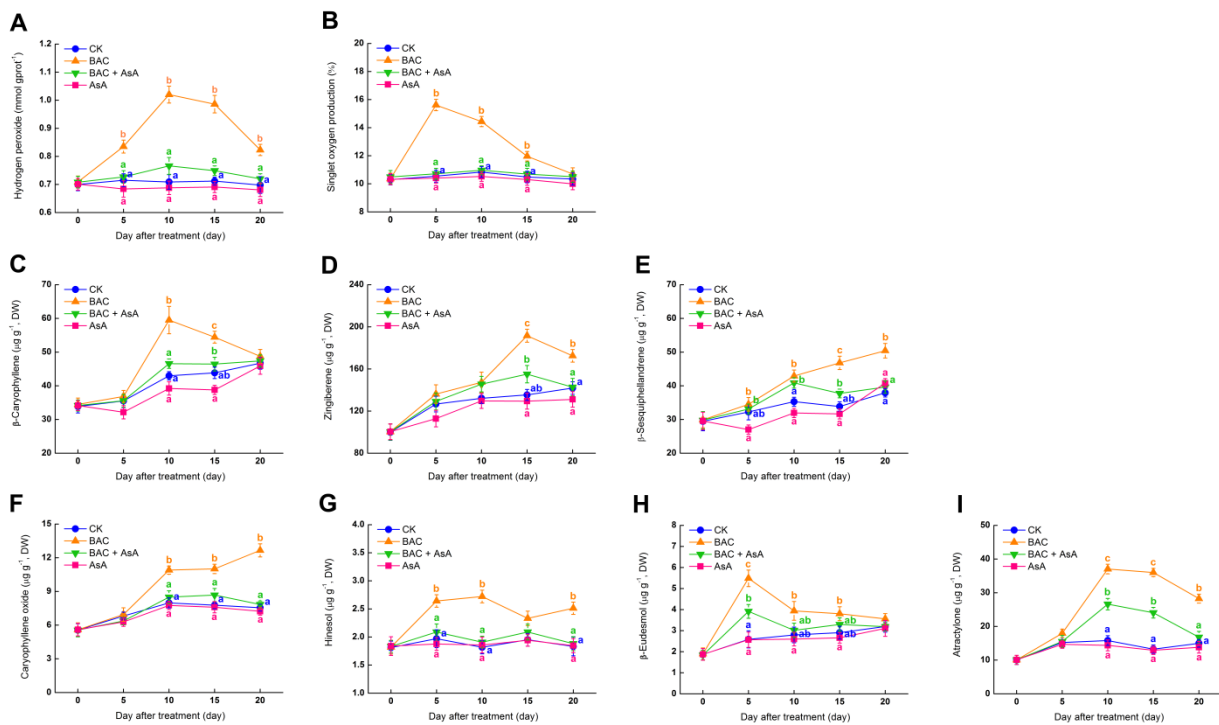

37  
 38 **FIG S4** Content of endogenous hydrogen peroxide, single oxygen, and seven main sesquiterpenoids in  
 39 *Atractylodes lancea* treated with ascorbic acid before bacterial inoculation over time. (A) Hydrogen peroxide. (B)  
 40 Single oxygen. (C)  $\beta$ -Caryophyllene. (D) Zingiberene. (E)  $\beta$ -Sesquiphellandrene. (F) Caryophyllene oxide. (G)  
 41 Hinesol. (H)  $\beta$ -Eudesmol. (I) Atractylone. Results are means for three biological replicates. Error bars indicate  
 42 standard deviations. Different lowercase letters indicate significant differences at  $P < 0.05$ . \* indicates significant  
 43 differences at  $P < 0.05$  and \*\* indicates significant differences at  $P < 0.01$ . CK stands for control. BAC stands for  
 44 *P. fluorescens* ALEB7B. AsA stands for ascorbic acid.

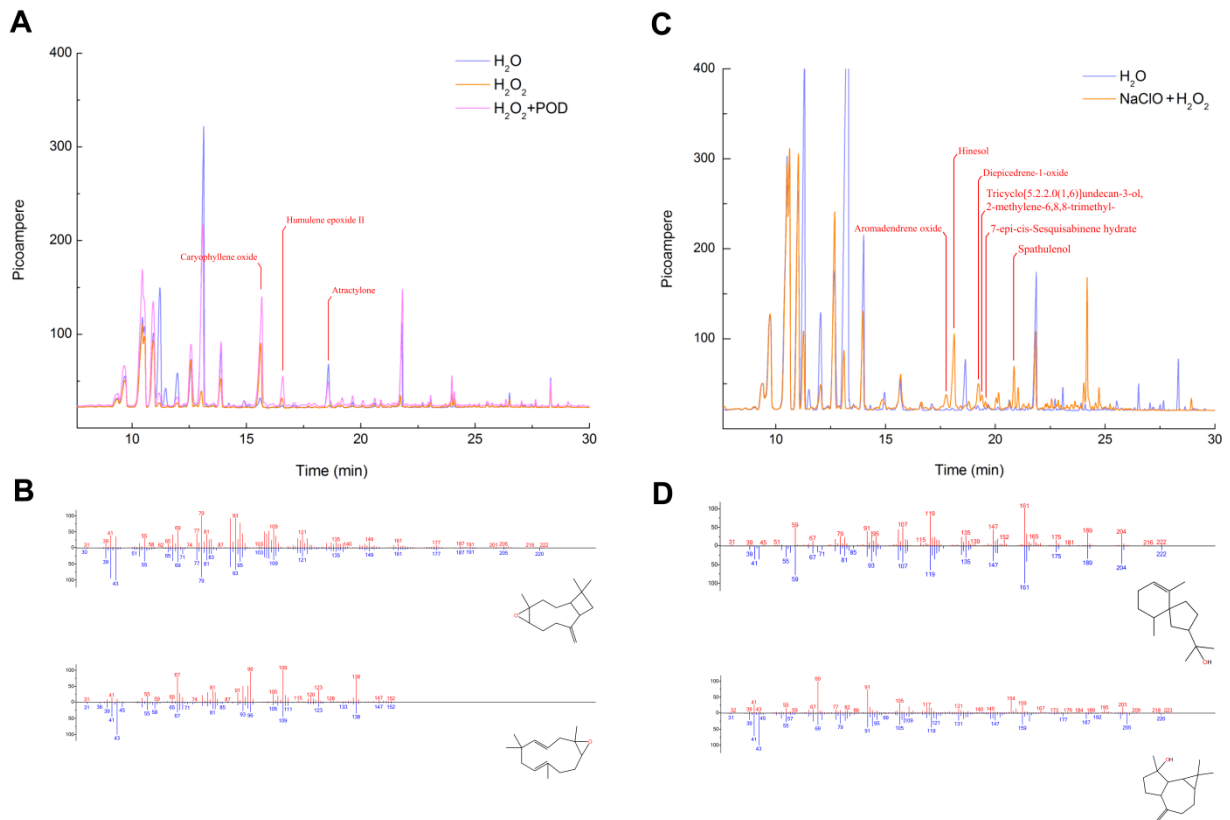

45  
 46 **FIG S5** Total ion chromatogram and mass spectrogram of oxidized products in total extracted sesquiterpenoids  
 47 treated with oxidants. (A) Total ion chromatogram of oxidized products in total extracted sesquiterpenoids treated  
 48 with hydrogen peroxide and hydrogen peroxide + peroxidase. (B) Mass spectrogram of caryophyllene oxide and  
 49 humulene epoxide II. (C) Total ion chromatogram of oxidized products in total extracted sesquiterpenoids treated  
 50 with hydrogen peroxide + sodium hypochlorite. (D) Mass spectrogram of hinesol and spathulenol. H<sub>2</sub>O<sub>2</sub> stands for  
 51 hydrogen peroxide. POD stands for peroxidase. NaClO stands for sodium hypochlorite.
